# Supplementary material for: Dimensionally integrated nanoarchitectonics for a novel composite from 0D, 1D, and 2D nanomaterials: RGO/CNT/CeO2ternary nanocomposites with electrochemical performance
Source: Royal Society of Chemistry journal article supplement (doi:10.1039/c4ta03996c), 2014-01-01
Supplement: c4ta03996c1.pdf [file c4ta03996c1.pdf]

## Electronic Supporting Information

### **Dimensionally Integrated Nanoarchitectonics for Novel Composite from 0D, 1D, and 2D Nanomaterials: RGO/CNT/CeO<sub>2</sub> Ternary Nanocomposite with Electrochemical Performance**

Raja Rajendran,<sup>a,b</sup> Lok Kumar Shrestha,<sup>\*a</sup> Kosuke Minami<sup>a</sup>, Munisamy Subramanian,<sup>b</sup> Ramasamy Jayavel,<sup>b</sup> and Katsuhiko Ariga<sup>a</sup>

<sup>a</sup> International Center for Materials Nanoarchitectonics (WPI-MANA), National Institute for Materials Science (NIMS), 1-1 Namiki, Tsukuba, Ibaraki 305-0044, Japan. Email:

SHRESTHA.Lokkumar@nims.go.jp

<sup>b</sup> Centre for Nanoscience and Technology, Anna University, Chennai-600025, India.

**Contents:**

|                                                                                      |    |
|--------------------------------------------------------------------------------------|----|
| 1. Additional TEM images of CNT/CeO <sub>2</sub> binary nanocomposite .....          | S3 |
| 2. Additional TEM images of RGO/CNT/CeO <sub>2</sub> ternary nanocomposite .....     | S4 |
| 3. Additional HR-TEM images of RGO/CNT/CeO <sub>2</sub> ternary nanocomposite .....  | S5 |
| 4. TEM/EDS elemental mapping of RGO/CNT/CeO <sub>2</sub> ternary nanocomposite ..... | S6 |
| 5. CV curve of CeO <sub>2</sub> nanocrystal .....                                    | S7 |
| 6. Cyclic stability curve of RGO/CNT/CeO <sub>2</sub> ternary composite .....        | S8 |

**1. Additional TEM images of CNT/CeO<sub>2</sub> binary nanocomposite**

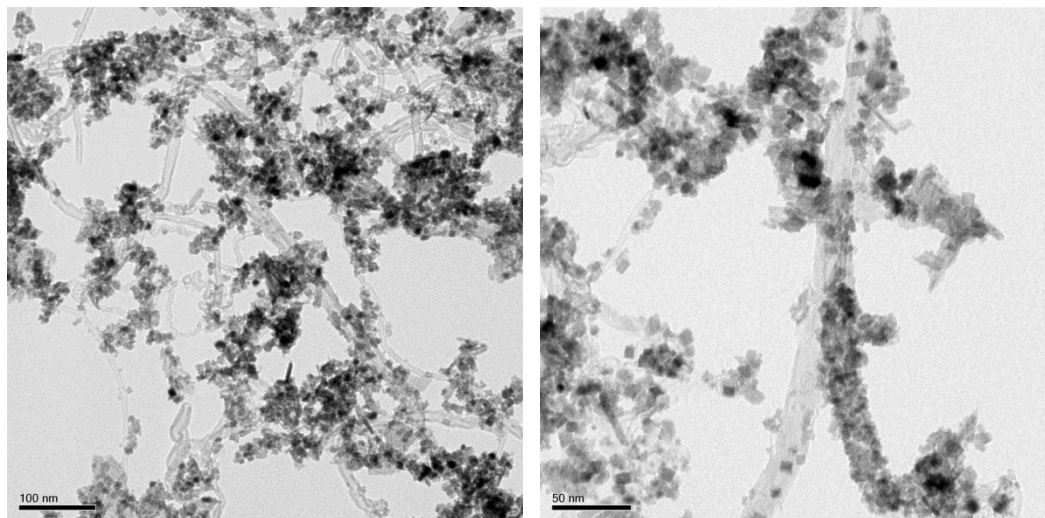

**Fig. S1** TEM images of CNT/CeO<sub>2</sub> binary nanocomposite

## 2. Additional TEM images of RGO/CNT/CeO<sub>2</sub> ternary nanocomposite

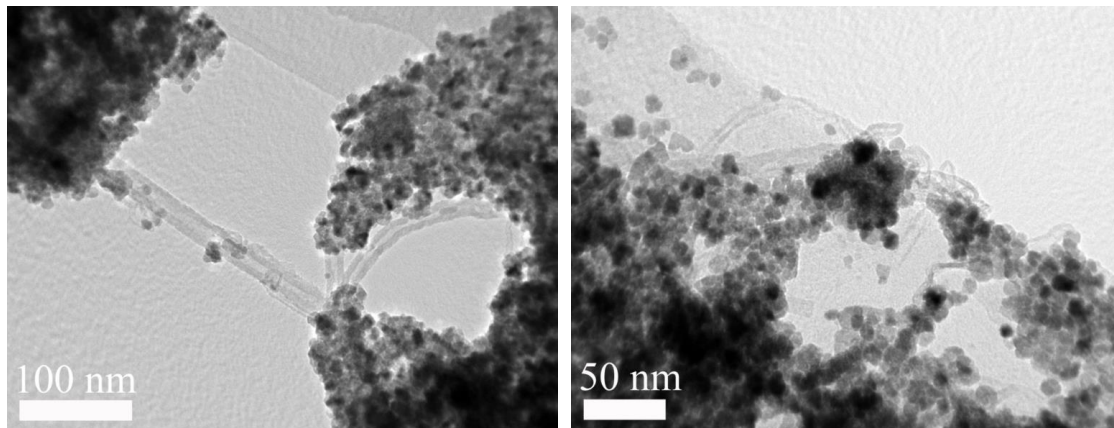

**Fig. S2** TEM images of RGO/CNT/CeO<sub>2</sub> ternary nanocomposite

**3. Additional HR-TEM images of RGO/CNT/CeO<sub>2</sub> ternary nanocomposite**

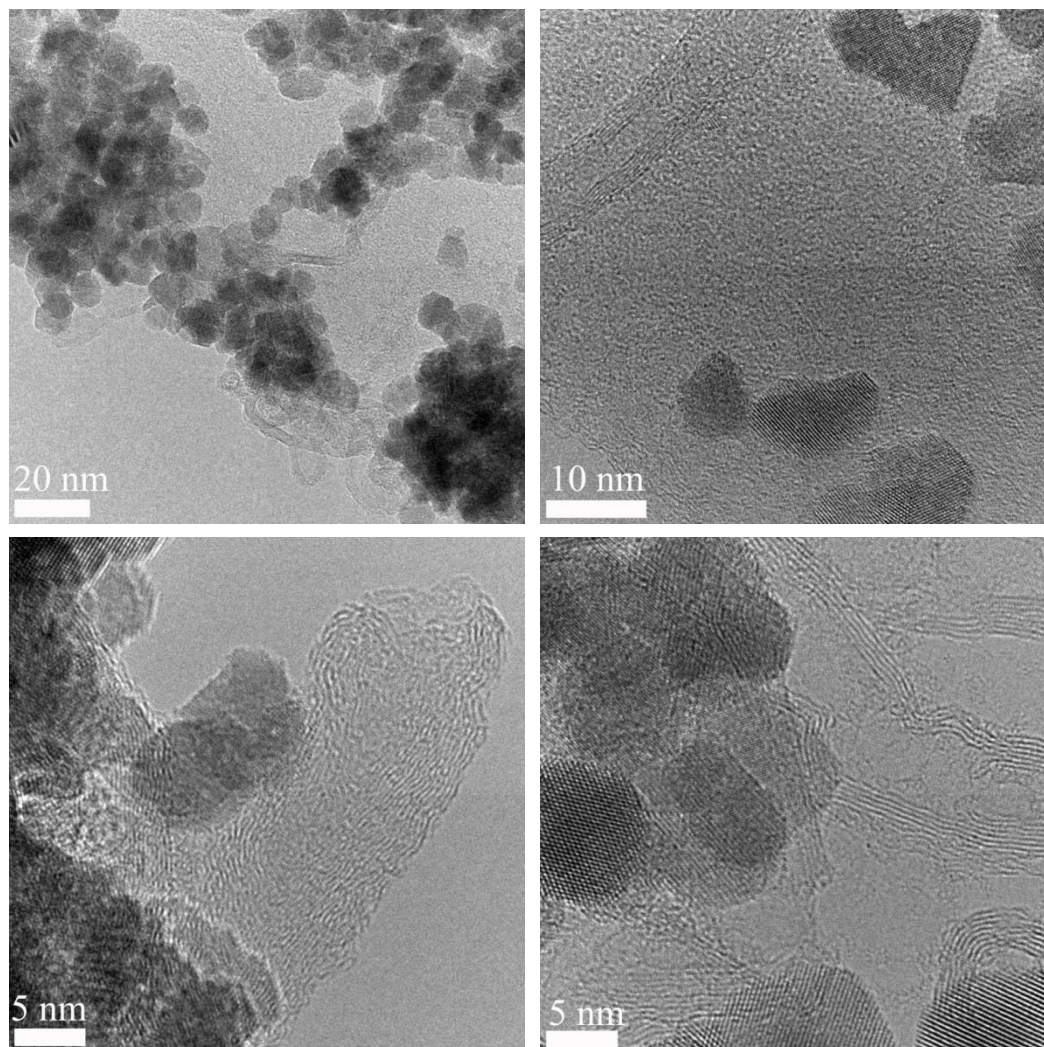

**Fig. S3** HR-TEM images of RGO/CNT/CeO<sub>2</sub> ternary nanocomposite

4. TEM/EDS elemental mapping of RGO/CNT/CeO<sub>2</sub> ternary nanocomposite

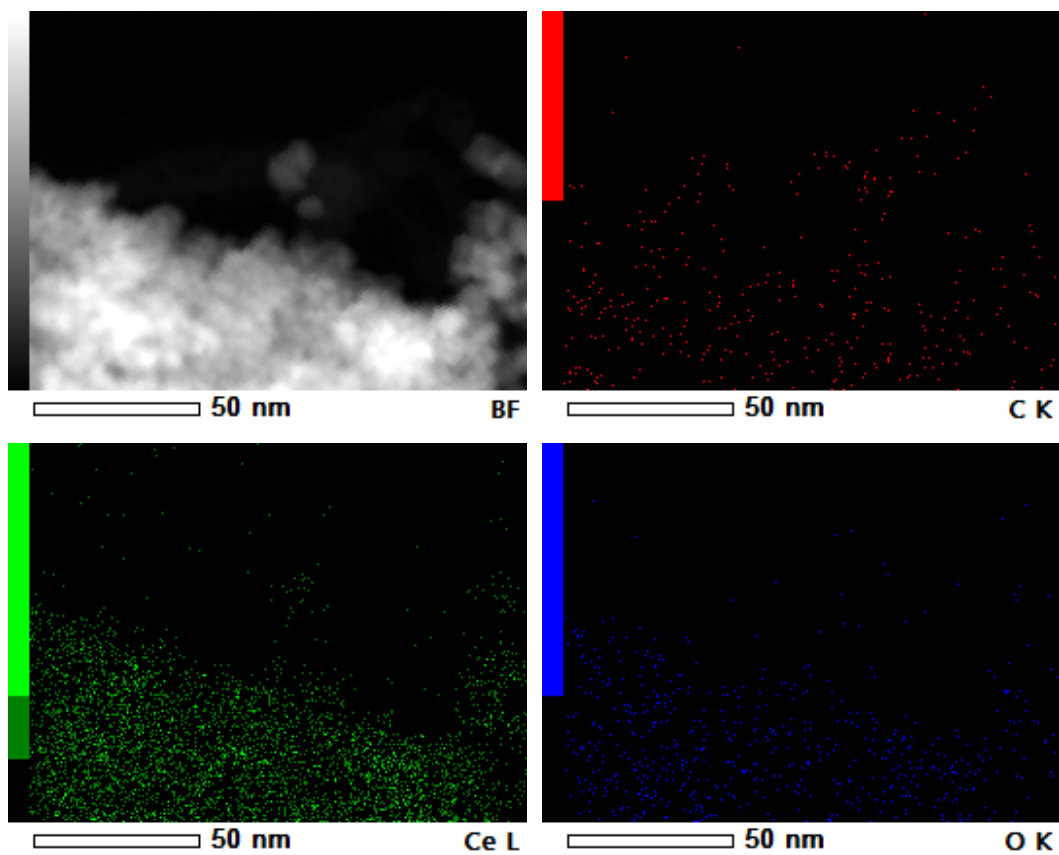

**Fig. S4** TEM/EDS elemental mapping of RGO/CNT/CeO<sub>2</sub> ternary nanocomposite

## 5. CV curve of CeO<sub>2</sub> nanocrystal

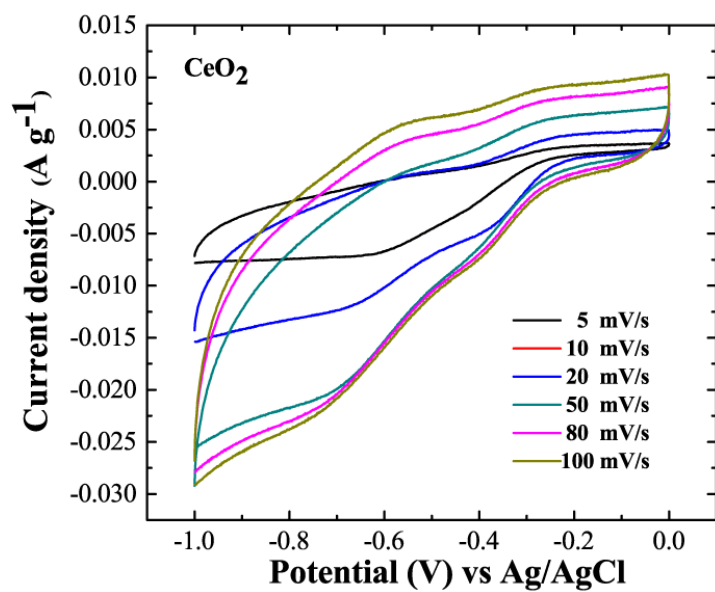

Fig. S5 CV curves of CeO<sub>2</sub> nanocrystals at different scan rates in 1M Na<sub>2</sub>SO<sub>4</sub> solution

6. Cyclic stability curve of  $\text{CeO}_2$ ,  $\text{CNT}/\text{CeO}_2$ ,  $\text{RGO}/\text{CNT}/\text{CeO}_2$

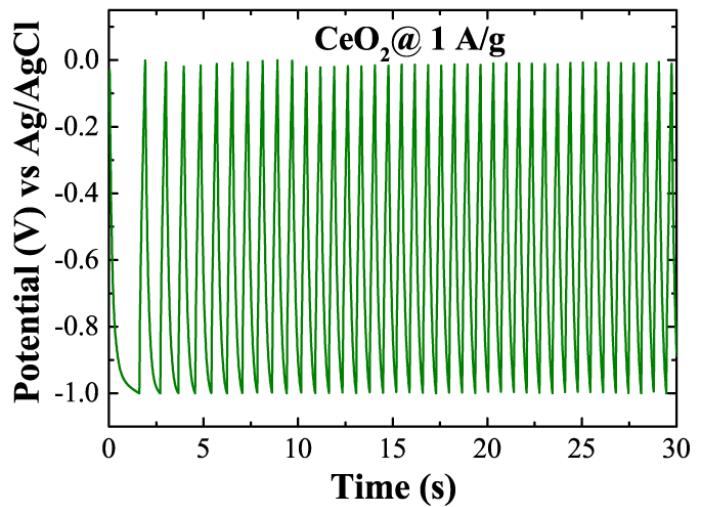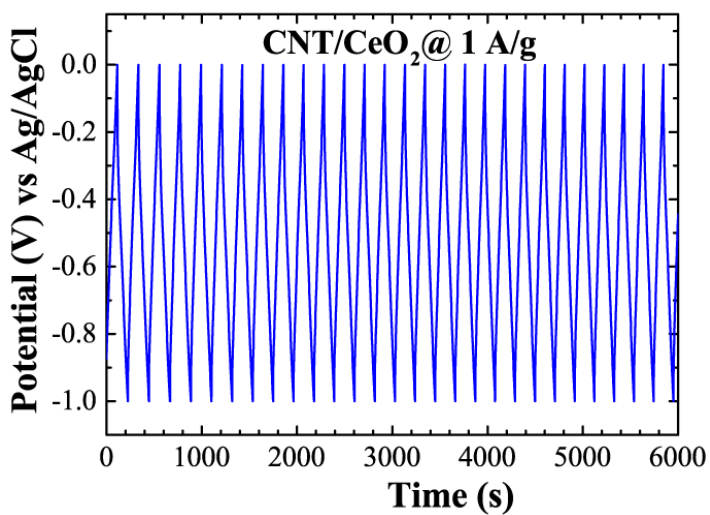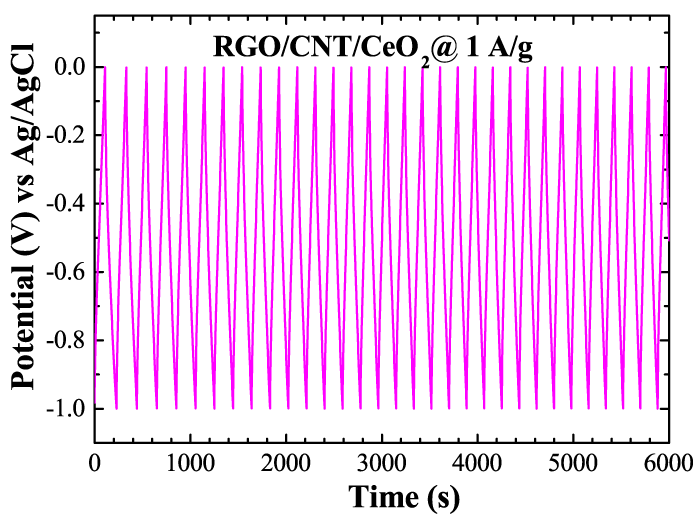

**Fig. S6** Cycle life curve of  $\text{CeO}_2$  (top),  $\text{CNT}/\text{CeO}_2$  (middle),  $\text{RGO}/\text{CNT}/\text{CeO}_2$  (bottom) at current density of 1 A/g
